# Supplementary material for: Partial nephrectomy versus radical nephrectomy for T1bN0M0 clear cell renal cell carcinomas: A population-based propensity score-matched analysis
Source: Research Square preprint supplement (doi:10.21203/rs.3.rs-1415218/v1), 2022-06-06
Supplement: Supplementary file 3 [file 63bf70eb6dc9a984c07aaa79.docx]

**S Table 1. Clinicopathological characteristics of cc-RCC stratified by tumor size before PSM.**

|  | **>40mm, -<50mm cc-RCC before PSM** | | |  | **>50mm, -<60mm cc-RCC before PSM** | | |  | **>60mm, -<70mm cc-RCC before PSM** | | |
| --- | --- | --- | --- | --- | --- | --- | --- | --- | --- | --- | --- |
|  | **PN(N=1665)** | **RN(N=4103)** | **P** |  | **PN(N=735)** | **RN(N=3153)** | **P** |  | **PN(N=281)** | **RN(N=2029)** | **P** |
| **Age** |  |  | <0.001 |  |  |  | 0.041 |  |  |  | <0.534 |
| <65y | 1026(61.62) | 2276(55.47) |  |  | 459(62.45) | 1839(58.33) |  |  | 177(62.99) | 1239(61.06) |  |
| ≥65y | 639(38.38) | 1827(44.53) |  |  | 276(37.55) | 1314(41.67) |  |  | 104(37.01) | 790(38.94) |  |
| **Gender** |  |  | 0.033 |  |  |  | 0.034 |  |  |  | 0.009 |
| Female | 638(38.32) | 1697(41.36) |  |  | 263(35.78) | 1262(40.03) |  |  | 87(30.96) | 792(39.03) |  |
| Male | 1027(61.68) | 2406(58.64) |  |  | 472(64.22) | 1891(59.97) |  |  | 194(68.04) | 1237(60.97) |  |
| **Race** |  |  | 0.498 |  |  |  | 0.319 |  |  |  | 0.798 |
| White | 1386(83.24) | 3476(84.72) |  |  | 600(81.63) | 2628(83.35) |  |  | 233(82.92) | 1725(85.02) |  |
| Black | 144(8.65) | 310(7.56) |  |  | 65(8.84) | 278(8.82) |  |  | 26(9.25) | 156(7.69) |  |
| Other† | 126(7.57) | 294(7.17) |  |  | 61(8.30) | 225(7.14) |  |  | 20(7.12) | 133(6.55) |  |
| Unknown | 9(0.54) | 23(0.56) |  |  | 9(1.22) | 22(0.70) |  |  | 2(0.71) | 15(0.74) |  |
| **Laterality** |  |  | 0.743 |  |  |  | 0.514 |  |  |  | 0.531 |
| Left | 806(48.41) | 2020(49.23) |  |  | 362(49.25) | 1595(50.59) |  |  | 147(52.31) | 1021(50.32) |  |
| Right | 859(51.59) | 2083(50.77) |  |  | 373(50.75) | 1558(49.41) |  |  | 134(47.69) | 1008(49.68) |  |
| **Lymphadenectomy** |  |  | 0.571 |  |  |  | <0.001 |  |  |  | 0.013 |
| Yes | 59(3.54) | 288(7.02) |  |  | 37(5.03) | 304(9.64) |  |  | 21(7.47) | 256(12.62) |  |
| No | 1606(96.46) | 3815(92.98) |  |  | 698(94.97) | 2849(90.36) |  |  | 260(92.53) | 1773(87.38) |  |
| **Survival Rate** |  |  | <0.0001 |  |  |  | 0.2792 |  |  |  | 0.1695 |
| 3 years(%) | 93.27 | 91.69 |  |  | 91.95 | 90.81 |  |  | 89.33 | 88.72 |  |
| 5 years(%) | 87.25 | 84.54 |  |  | 85.47 | 83.98 |  |  | 82.89 | 81.21 |  |
| 10 years(%) | 75.19 | 65.77 |  |  | 69.13 | 66.29 |  |  | 71.07 | 61.28 |  |
| Median survival(m) | NR | 173 |  |  | NR | 171 |  |  | NR | 169 |  |

†: Including Indian/AK Native, Asian/Pacific Islander.
