# Supplementary material for: Partial nephrectomy versus radical nephrectomy for T1bN0M0 clear cell renal cell carcinomas: A population-based propensity score-matched analysis
Source: Research Square preprint supplement (doi:10.21203/rs.3.rs-1415218/v1), 2022-06-06
Supplement: Supplementary file 4 [file a60986dbe50e0cce12e59d79.docx]

**S Table 2. Clinicopathological characteristics of cc-RCC stratified by tumor size after PSM.**

|  | **>40mm, -<50mm cc-RCC after PSM** | | |  | **>50mm, -<60mm cc-RCC after PSM** | | |  | **>60mm, -<70mm cc-RCC after PSM** | | |
| --- | --- | --- | --- | --- | --- | --- | --- | --- | --- | --- | --- |
|  | **PN(N=1665)** | **RN(N=1665)** | **P** |  | **PN(N=735)** | **RN(N=762)** | **P** |  | **PN(N=281)** | **RN(N=254)** | **P** |
| **Age** |  |  | 1 |  |  |  | 0.379 |  |  |  | 0.102 |
| <65y | 1026(61.62) | 1026(61.62) |  |  | 459(62.45) | 459(60.24) |  |  | 177(62.99) | 177(69.69) |  |
| ≥65y | 639(38.38) | 639(38.38) |  |  | 276(37.55) | 303(39.76) |  |  | 104(37.01) | 77(30.31) |  |
| **Gender** |  |  | 1 |  |  |  | 0.607 |  |  |  | 0.058 |
| Female | 638(38.32) | 638(38.32) |  |  | 263(35.78) | 263(34.51) |  |  | 87(30.96) | 60(23.62) |  |
| Male | 1027(61.68) | 1027(61.68) |  |  | 472(64.22) | 499(65.49) |  |  | 194(68.04) | 194(76.38) |  |
| **Race** |  |  | 0.444 |  |  |  | 0.635 |  |  |  | 0.826 |
| White | 1386(83.24) | 1405(84.38) |  |  | 600(81.63) | 630(82.68) |  |  | 233(82.92) | 210(82.68) |  |
| Black | 144(8.65) | 122(7.33) |  |  | 65(8.84) | 70(9.19) |  |  | 26(9.25) | 24(9.45) |  |
| Other† | 126(7.57) | 125(7.51) |  |  | 61(8.30) | 57(7.48) |  |  | 20(7.12) | 16(6.30) |  |
| Unknown | 9(0.54) | 13(0.78) |  |  | 9(1.22) | 5(0.66) |  |  | 2(0.71) | 4(1.57) |  |
| **Laterality** |  |  | 0.677 |  |  |  | 0.396 |  |  |  | 0.176 |
| Left | 806(48.41) | 794(47.69) |  |  | 362(49.25) | 392(51.44) |  |  | 147(52.31) | 118(46.46) |  |
| Right | 859(51.59) | 871(52.31) |  |  | 373(50.75) | 370(48.56) |  |  | 134(47.69) | 136(53.54) |  |
| **Lymphadenectomy** |  |  | 1 |  |  |  |  |  |  |  | 0.733 |
| Yes | 59(3.54) | 59(3.54) |  |  | 37(5.03) | 64(8.40) |  |  | 21(7.47) | 21(8.27) |  |
| No | 1606(96.46) | 1606(96.46) |  |  | 698(94.97) | 698(91.60) |  |  | 260(92.53) | 233(91.73) |  |
| **Survival Rate** |  |  | 0.0092 |  |  |  | 0.4102 |  |  |  | 0.3581 |
| 3 years(%) | 93.27 | 93.01 |  |  | 91.95 | 90.54 |  |  | 89.33 | 90.13 |  |
| 5 years(%) | 87.25 | 85.99 |  |  | 85.47 | 82.98 |  |  | 82.89 | 82.53 |  |
| 10 years(%) | 75.19 | 66.91 |  |  | 69.13 | 68.81 |  |  | 71.07 | 63.46 |  |
| Median survival(m) | NR | NR |  |  | NR | NR |  |  | NR | 169 |  |

†: Including Indian/AK Native, Asian/Pacific Islander.
