# Supplementary material for: Partial nephrectomy versus radical nephrectomy for T1bN0M0 clear cell renal cell carcinomas: A population-based propensity score-matched analysis
Source: Research Square preprint supplement (doi:10.21203/rs.3.rs-1415218/v1), 2022-06-06
Supplement: Supplementary file 5 [file 4d41d192eef81b16d98a4dc0.docx]

**S table 4. Clinicopathological characteristics of cc-RCC stratified by age after PSM.**

|  | **Age<65 cc-RCC after PSM** | | |  | **Age≥65 cc-RCC after PSM** | | |
| --- | --- | --- | --- | --- | --- | --- | --- |
|  | **PN(N=1662)** | **RN(N=1662)** | **P** |  | **Sub(N=1019)** | **RN(N=1019)** | **P** |
| **Gender** |  |  | 1 |  |  |  | 0.209 |
| Female | 620(37.30) | 620(37.30) |  |  | 368(36.11) | 341(33.46) |  |
| Male | 1042(62.70) | 1042(62.70) |  |  | 651((63.89) | 678(66.54) |  |
| **Race** |  |  | 0.794 |  |  |  | 0.760 |
| White | 1357(81.65) | 1379(82.97) |  |  | 862(84.59) | 866(84.99) |  |
| Black | 153(9.21) | 140(8.42) |  |  | 82(8.05) | 76(7.46) |  |
| Other† | 135(8.12) | 127(7.64) |  |  | 72(7.07) | 71(6.97) |  |
| Unknown | 17(1.02) | 16(0.96) |  |  | 3(0.39) | 6(0.59) |  |
| **Location** |  |  | 0.199 |  |  |  | 0.249 |
| Left | 833(50.12) | 796(47.89) |  |  | 482(47.30) | 508(49.85) |  |
| Right | 829(49.88) | 866(52.11) |  |  | 537(52.70) | 511(50.15) |  |
| **Size** |  |  | <0.001 |  |  |  | 0.401 |
| ＞40mm, ≤50mm | 1026(61.73) | 1026(61.73) |  |  | 639(62.71) | 639(62.71) |  |
| ＞50mm, ≤60mm | 459(27.62) | 459(27.62) |  |  | 276(27.09) | 303(29.74) |  |
| ＞60mm, ≤70mm | 177(10.65) | 177(10.65) |  |  | 104(10.21) | 77(7.56) |  |
| **Lymphadenectomy** |  |  | 1 |  |  |  | 0.071 |
| Yes | 75(4.51) | 75(4.51) |  |  | 42(2.12) | 69(6.77) |  |
| No | 1587(95.49) | 1587(95.49) |  |  | 977(95.88) | 950(93.23) |  |
| **Survival Rate** |  |  | 0.0197 |  |  |  | 0.0485 |
| 3 years(%) | 94.92 | 94.94 |  |  | 88.551 | 87.28 |  |
| 5 years(%) | 91.36 | 90.24 |  |  | 78.09 | 75.94 |  |
| 10 years(%) | 83.93 | 78.69 |  |  | 56.01 | 47.31 |  |
| Median survival(m) | NR | NR |  |  | 137 | 115 |  |

†: Including Indian/AK Native, Asian/Pacific Islander.
