# Supplementary material for: Partial nephrectomy versus radical nephrectomy for T1bN0M0 clear cell renal cell carcinomas: A population-based propensity score-matched analysis
Source: Research Square preprint supplement (doi:10.21203/rs.3.rs-1415218/v1), 2022-06-06
Supplement: Supplementary file 6 [file 61d39963f80ecf19190e79fb.docx]

**S table 3. Clinicopathological characteristics of cc-RCC stratified by age before PSM.**

|  | **Age<65 cc-RCC before PSM** | | |  | **Age≥65 cc-RCCbefore PSM** | | |
| --- | --- | --- | --- | --- | --- | --- | --- |
|  | **PN(N=1662)** | **RN(N=5354)** | **P** |  | **PN(N=1019)** | **RN(N=3931)** | **P** |
| **Gender** |  |  | 0.734 |  |  |  | <0.001 |
| Female | 620(37.30) | 2022(37.77) |  |  | 368(36.11) | 1729(43.98) |  |
| Male | 1042(62.70) | 3332(62.23) |  |  | 651((63.89) | 2202(56.02) |  |
| **Race** |  |  | 0.484 |  |  |  | 0.719 |
| White | 1357(81.65) | 4455(83.21) |  |  | 862(84.59) | 3374(85.83) |  |
| Black | 153(9.21) | 466(8.70) |  |  | 82(8.05) | 278(7.07) |  |
| Other† | 135(8.12) | 386(7.21) |  |  | 72(7.07) | 266(6.77) |  |
| Unknown | 17(1.02) | 47(0.88) |  |  | 3(0.39) | 13(0.33) |  |
| **Location** |  |  | 0.900 |  |  |  | 0.138 |
| Left | 833(50.12) | 2674(49.94) |  |  | 482(47.30) | 1962(49.91) |  |
| Right | 829(49.88) | 2680(50.06) |  |  | 537(52.70) | 1969(50.09) |  |
| **Size** |  |  | <0.001 |  |  |  | <0.001 |
| ＞40mm, ≤50mm | 1026(61.73) | 2276(42.51) |  |  | 639(62.71) | 1827(46.48) |  |
| ＞50mm, ≤60mm | 459(27.62) | 1839(34.35) |  |  | 276(27.09) | 1314(33.43) |  |
| ＞60mm, ≤70mm | 177(10.65) | 1239(23.14) |  |  | 104(10.21) | 790(20.10) |  |
| **Lymphadenectomy** |  |  | <0.001 |  |  |  | <0.001 |
| Yes | 75(4.51) | 526(9.82) |  |  | 42(2.12) | 322(8.19) |  |
| No | 1587(95.49) | 4828(90.18) |  |  | 977(95.88) | 3609(91.81) |  |
| **Survival Rate** |  |  | 0.0025 |  |  |  | 0.0068 |
| 3 years(%) | 94.92 | 94.14 |  |  | 88.551 | 86.13 |  |
| 5 years(%) | 91.36 | 89.94 |  |  | 78.09 | 75.12 |  |
| 10 years(%) | 83.93 | 78.16 |  |  | 56.01 | 47.12 |  |
| Median survival(m) | NR | NR |  |  | 137 | 115 |  |

†: Including Indian/AK Native, Asian/Pacific Islander.
